# Supplementary material for: Low CDKN1B Expression Associated with Reduced CD8+ T Lymphocytes Predicts Poor Outcome in Breast Cancer in a Machine Learning Analysis
Source: MDPI journal article supplement (doi:10.3390/jpm14010030), 2023-12-25
Supplement: s1 [file s1]

**Supplementary table 1.** Disease-free and disease-specific survival analyses of p27 (encoded by CDKN1B gene) based on subtype.

| Covariate                 | Disease-free survival |       |       |       | Overall survival |       |       |       |
|---------------------------|-----------------------|-------|-------|-------|------------------|-------|-------|-------|
|                           | <i>p</i> value        | HR    | 95%CI |       | <i>p</i> value   | HR    | 95%CI |       |
| HR(+)HER2(-)              |                       |       |       |       |                  |       |       |       |
| Univariate                | <b>0.014</b>          | 0.504 | 0.292 | 0.869 | <b>0.003</b>     | 0.449 | 0.263 | 0.766 |
| Multivariate <sup>1</sup> | <b>0.043</b>          | 0.563 | 0.323 | 0.981 | <b>0.033</b>     | 0.556 | 0.324 | 0.954 |
| HR(+)HER2(+)              |                       |       |       |       |                  |       |       |       |
| Univariate                | <b>0.012</b>          | 0.237 | 0.078 | 0.725 | <b>0.032</b>     | 0.336 | 0.124 | 0.913 |
| Multivariate <sup>1</sup> | 0.131                 | 0.365 | 0.099 | 1.349 | 0.061            | 0.346 | 0.114 | 1.049 |
| HR(-)HER2(+)              |                       |       |       |       |                  |       |       |       |
| Univariate                | 0.371                 | 0.567 | 0.163 | 1.969 | 0.109            | 0.398 | 0.129 | 1.230 |
| Multivariate <sup>1</sup> | 0.489                 | 0.623 | 0.163 | 2.381 | 0.196            | 0.424 | 0.115 | 1.557 |
| HR(-)HER2(-)              |                       |       |       |       |                  |       |       |       |
| Univariate                | 0.123                 | 0.307 | 0.068 | 1.379 | 0.316            | 0.489 | 0.121 | 1.977 |
| Multivariate <sup>1</sup> | 0.276                 | 0.411 | 0.083 | 2.034 | 0.402            | 0.541 | 0.129 | 2.278 |

HR, hormone receptor; HER2, human epidermal growth factor receptor 2  
<sup>1</sup> Adjusted for T stage, N stage, histological grade, lymphatic invasion
